# Supplementary material for: Mesoporous alumina–zirconia–organosilica composites for CO2 capture at ambient and elevated temperatures
Source: Royal Society of Chemistry journal article supplement (doi:10.1039/c4ta04677c), 2014-12-04
Supplement: c4ta04677c1.pdf [file c4ta04677c1.pdf]

## Mesoporous alumina-zirconia-organosilica composites for CO<sub>2</sub> capture at ambient and elevated temperatures

Chamila Gunathilake and Mietek Jaroniec\*

*Department of Chemistry and Biochemistry, Kent State University, Kent, Ohio 44242, USA*

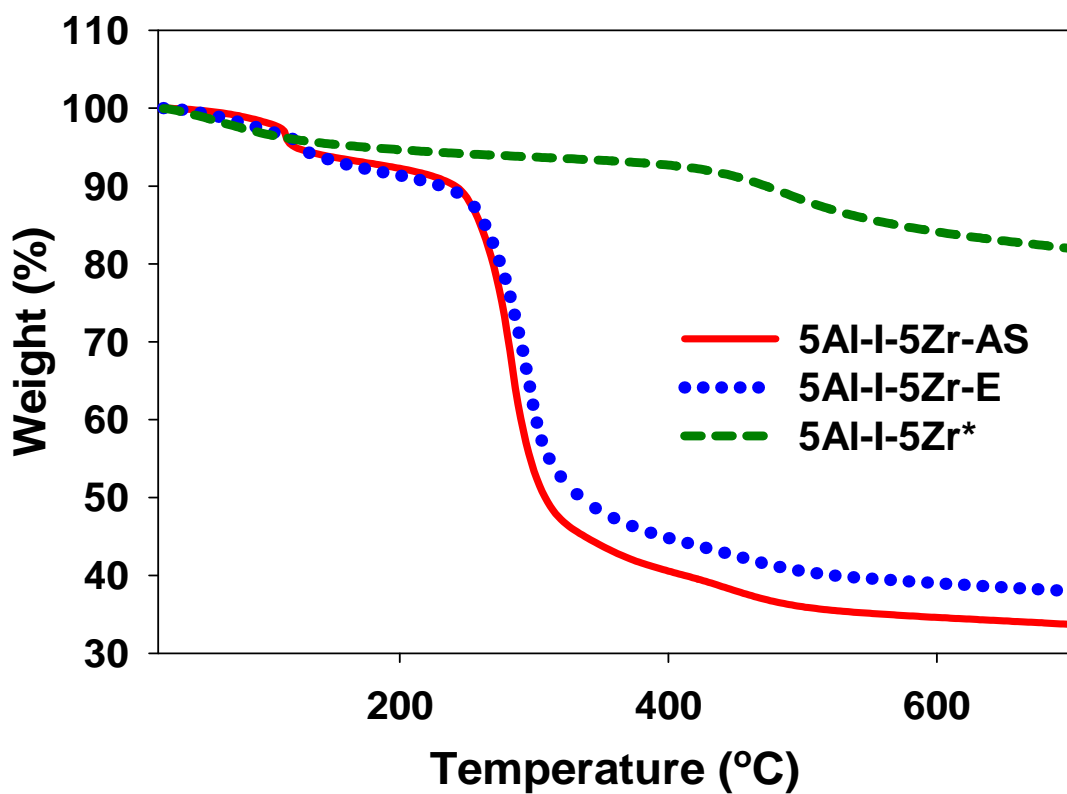

**Figure S1.** TG profiles of the as-synthesized (AS), extracted (E), and thermally treated (\*) samples.

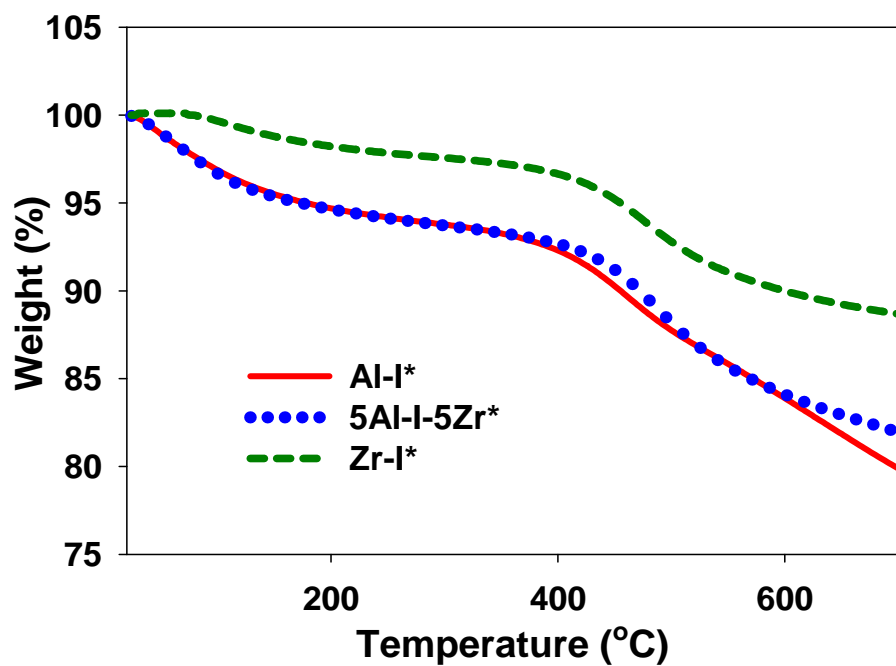

Figure S2. TG profiles of the extracted-thermally treated (\*) samples.

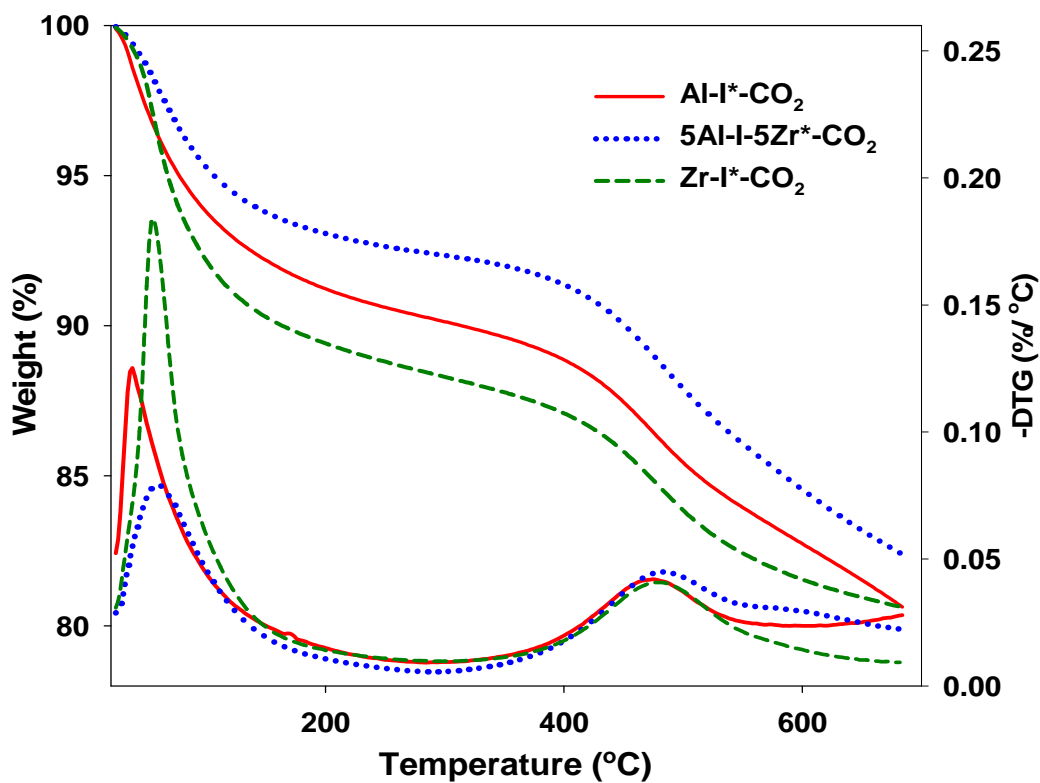

Figure S3. TG and DTG profiles of the samples with chemisorbed CO<sub>2</sub>.

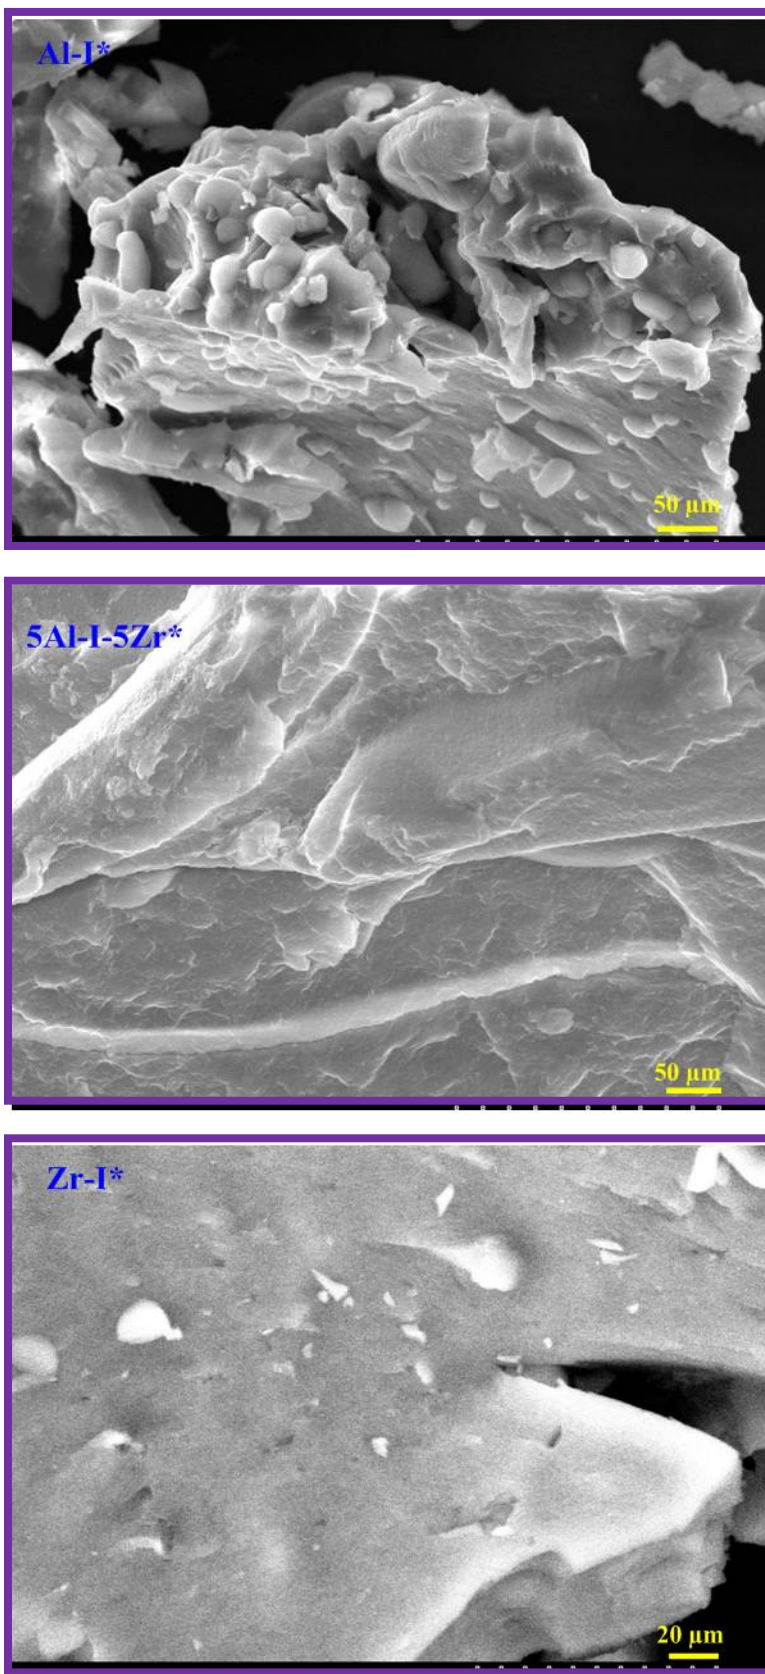

**Figure S4.** SEM images of the Al-I\* (top), 5Al-I\*-5Zr (middle), and Zr-I\* (bottom) samples.

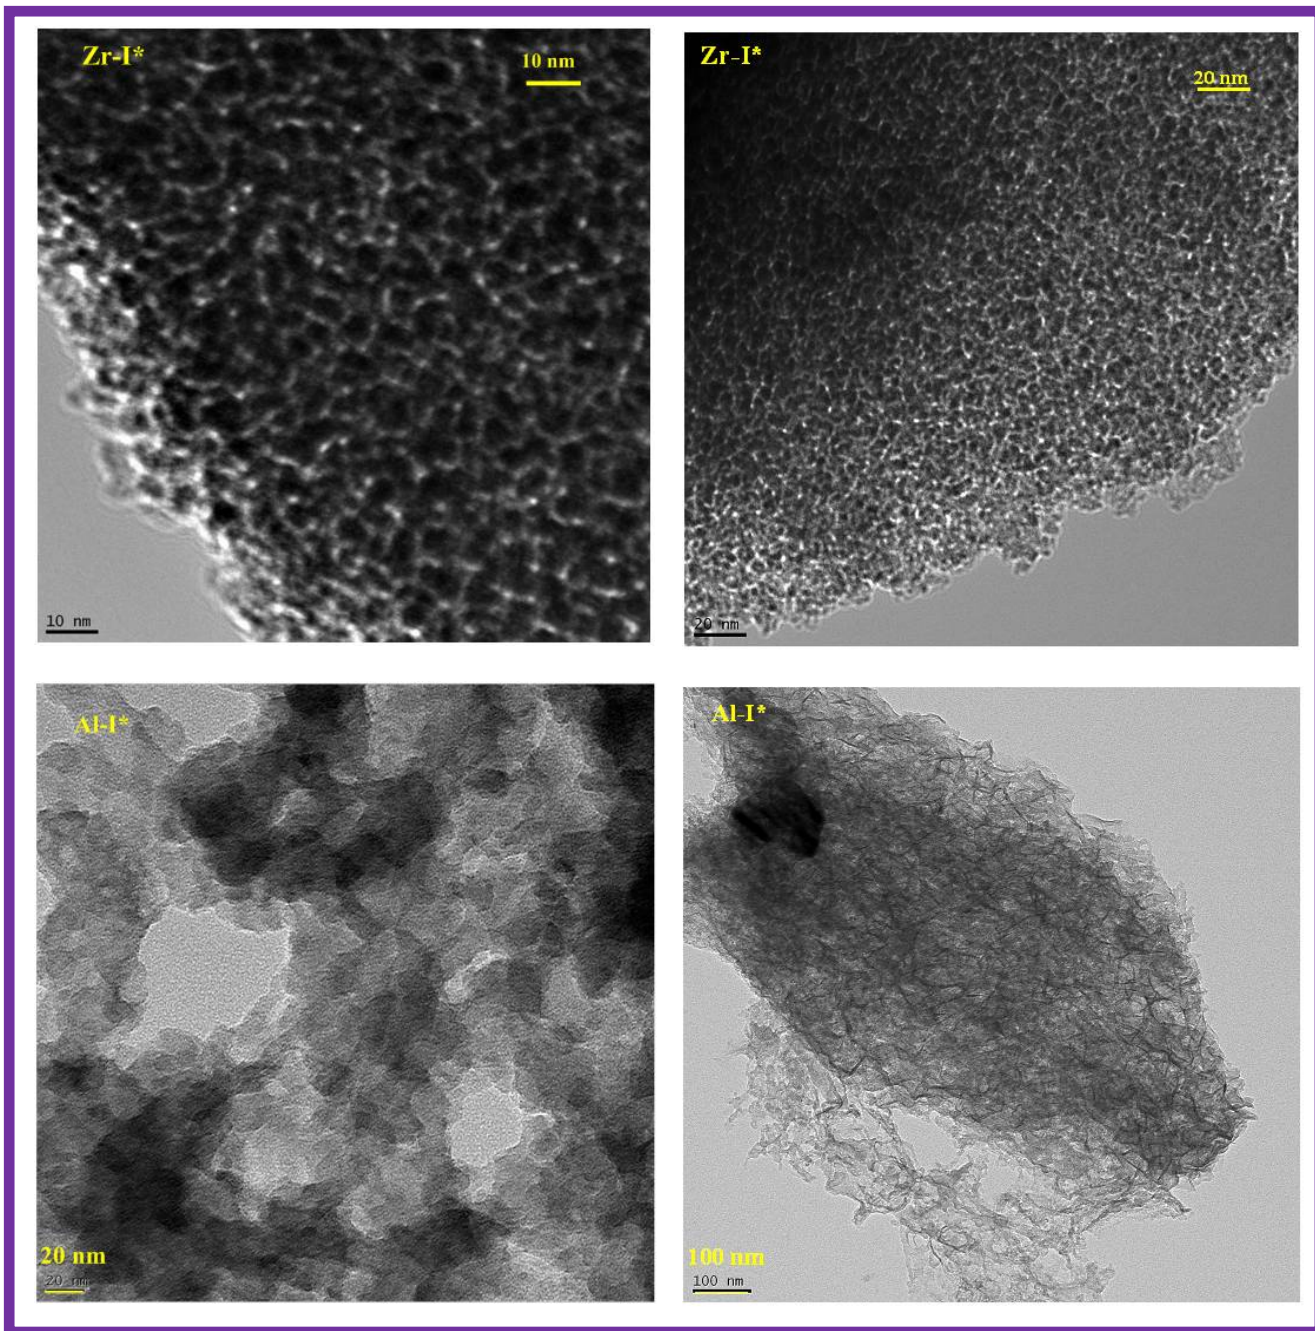

**Figure S5.** TM images of the Zr-I\* (top left and right panel) and Al-I\* (bottom left and right panel) samples.

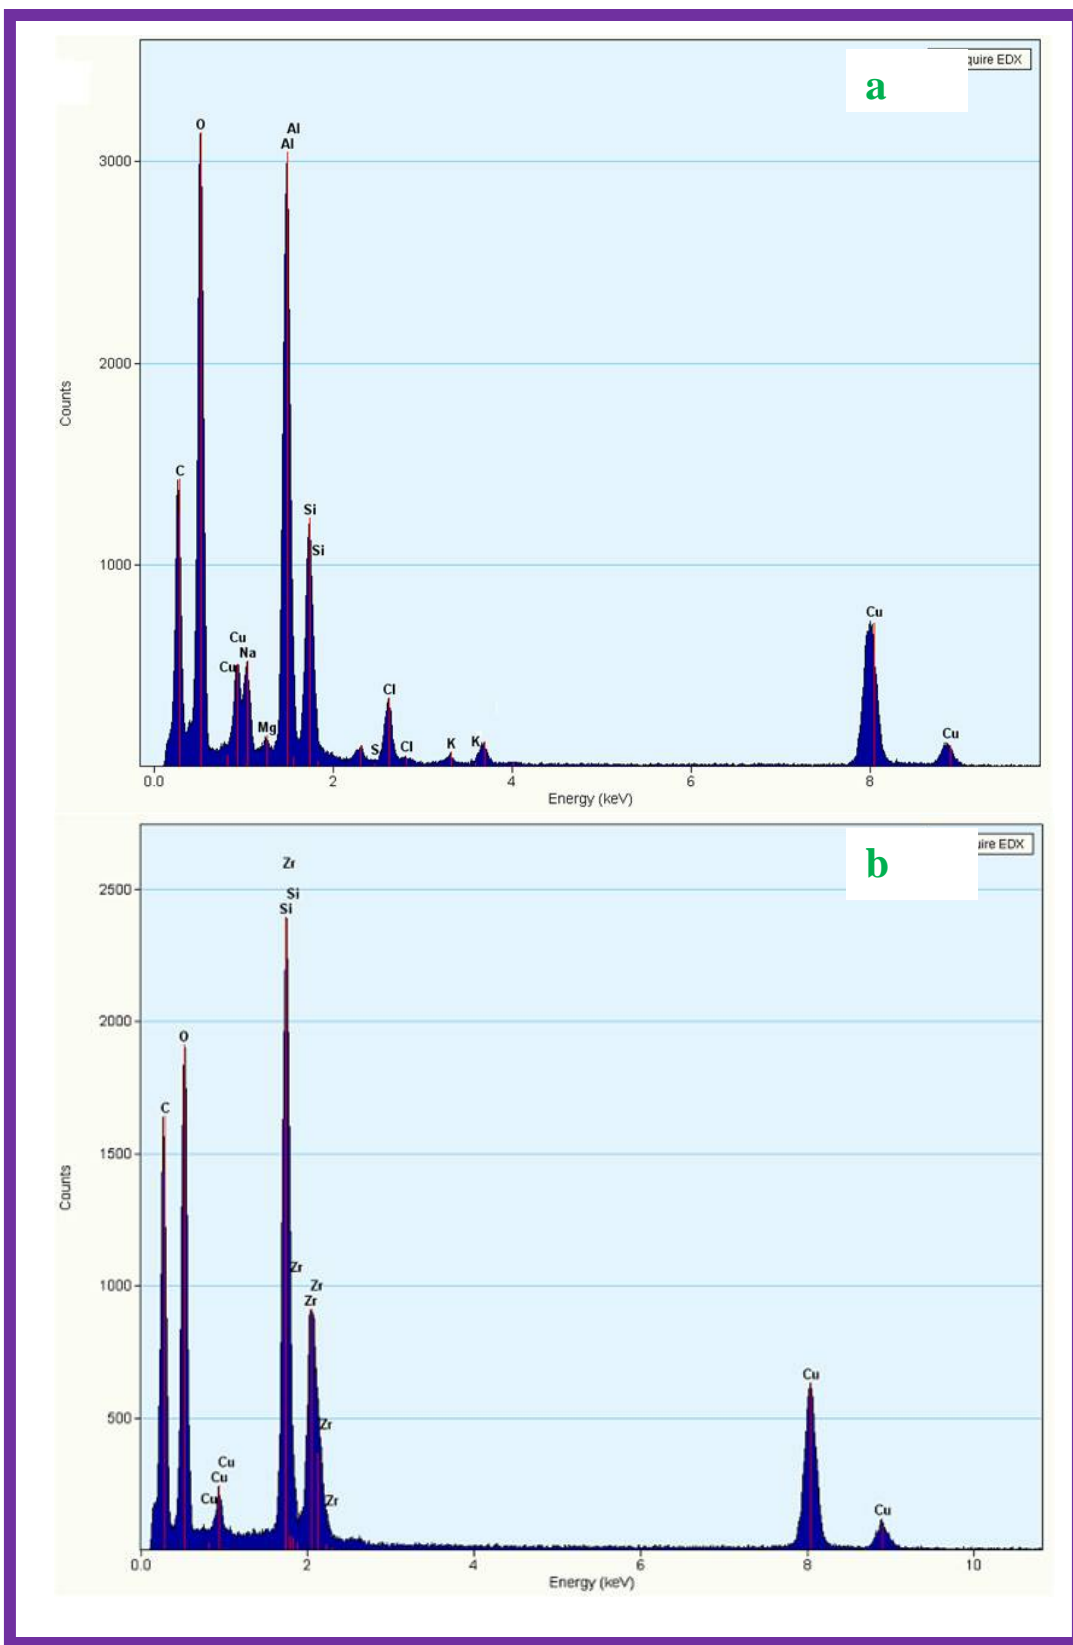

**Figure S6.** EDX spectra of the **a)** Al-I\* (top) and **b)** Zr-I\* (bottom) samples.

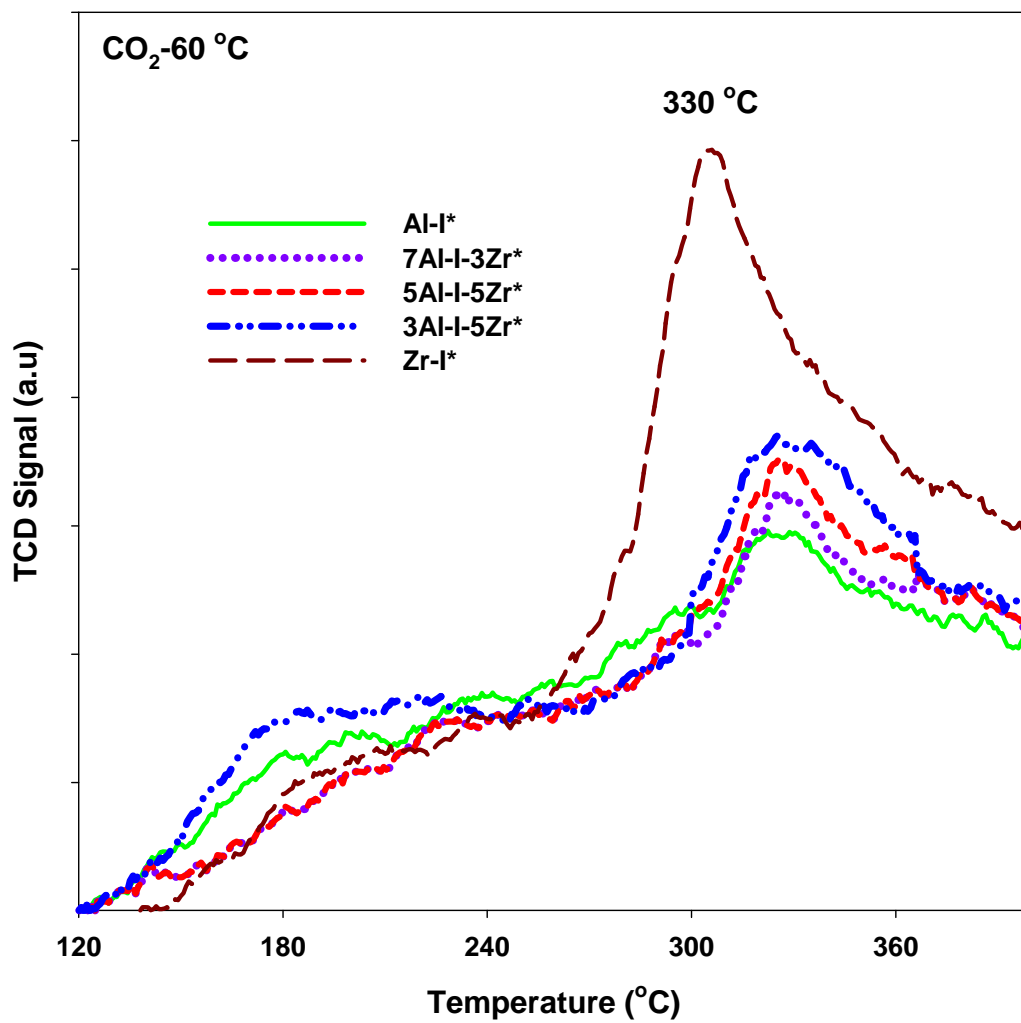

**Figure S7.** CO<sub>2</sub> TPD profiles recorded for the samples studied; pulse at 60 °C.

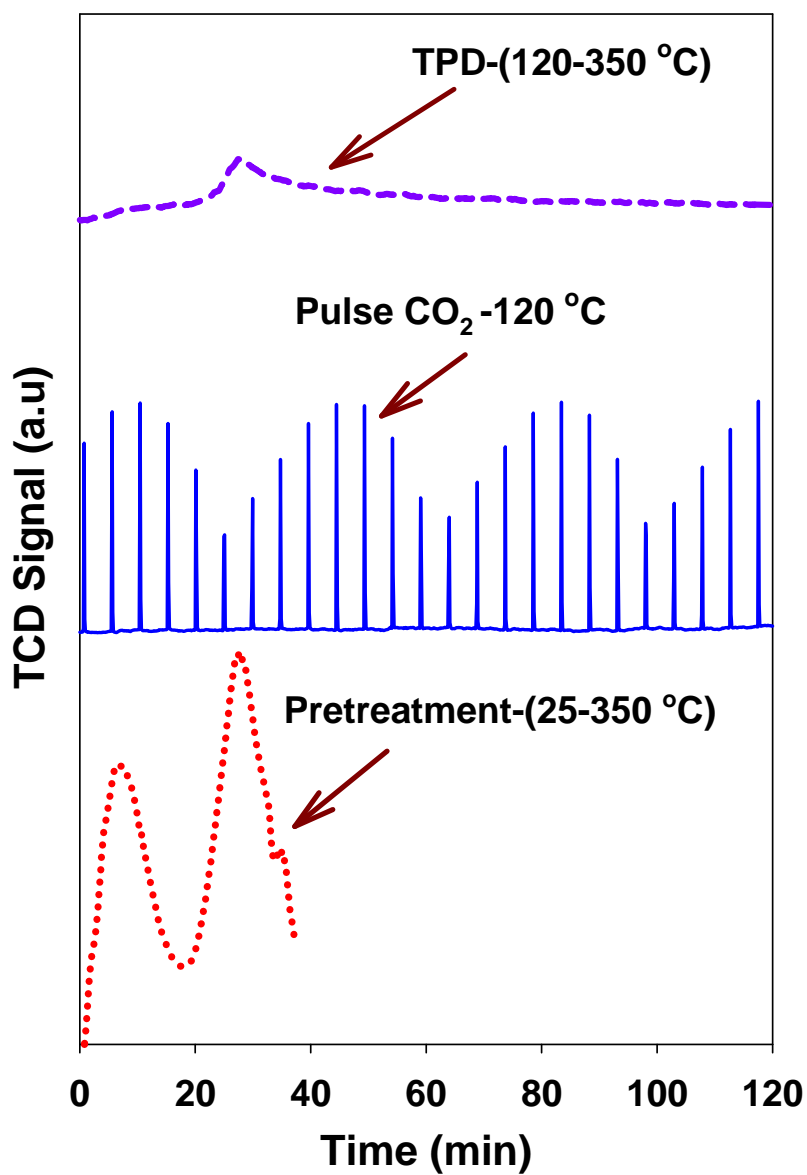

**Figure S8.** Pretreatment, pulse, and CO<sub>2</sub> TPD profiles of the Zr-I\* sample.

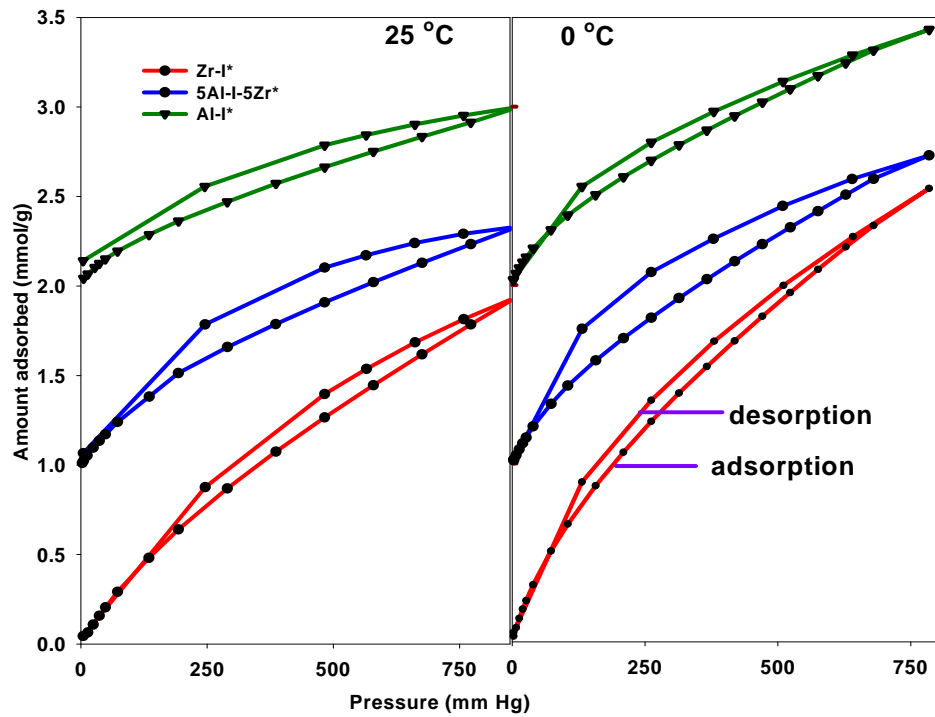

**Figure S9.** CO<sub>2</sub> adsorption-desorption isotherms at 25 °C (left panel) and 0 °C (right panel) measured on the Al-I\*, 5Al-I-5Zr\*, and Zr-I\* samples. The second & third isotherm curves on each panel are respectively shifted by 1 mmol/g and 2 mmol/g in relation to the first isotherm curve.

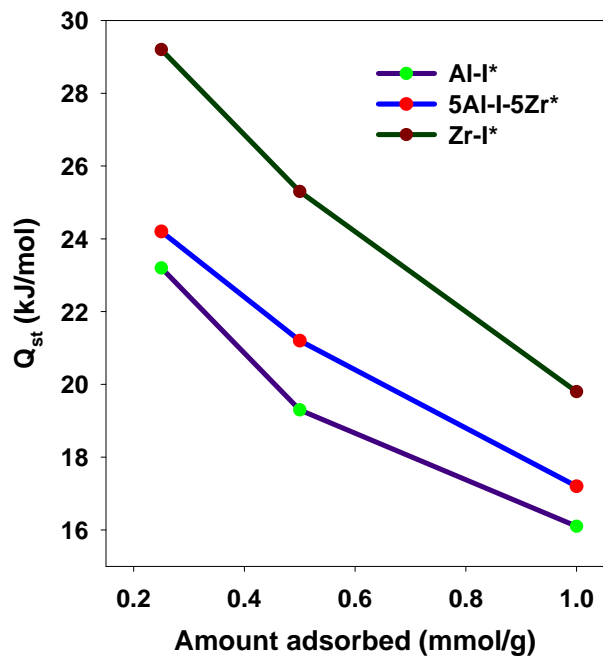

**Figure S10.** Variation of the isosteric heat of adsorption ( $Q_{st}$ ) on the surface coverage for the Al-I\*, 5Al-I-5Zr, and Zr-I\* samples.



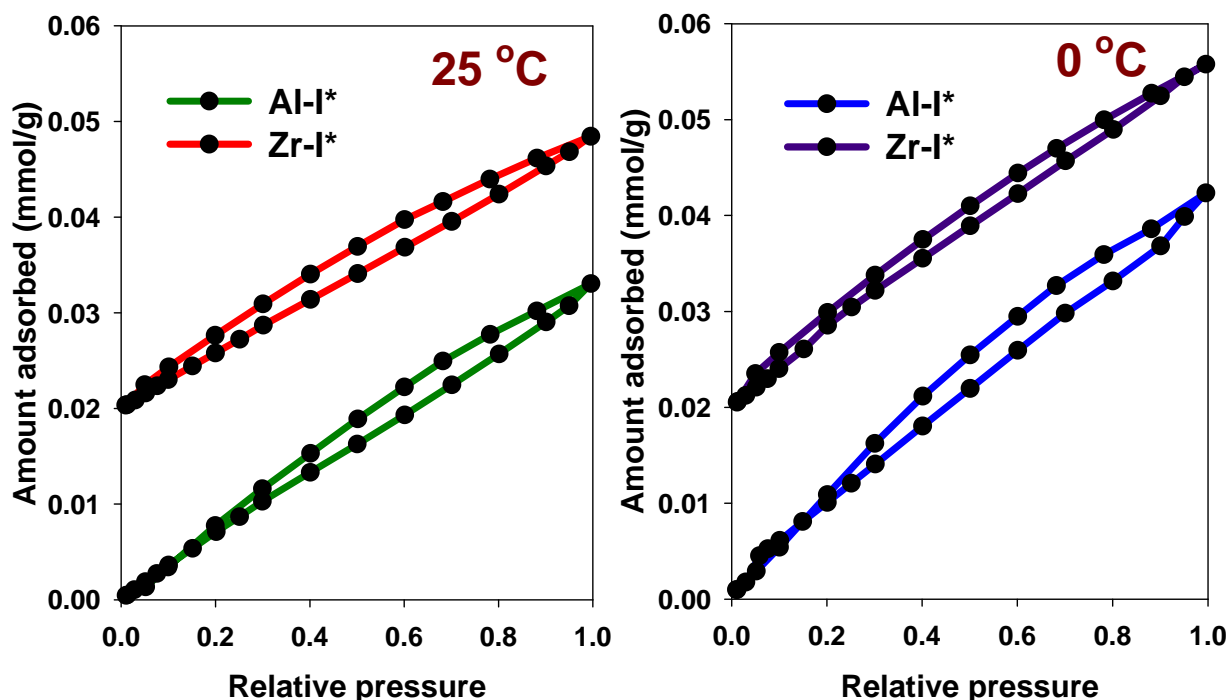

**Figure S11.** N<sub>2</sub> adsorption-desorption isotherms at 25 °C (left panel) and 0 °C (right panel) measured on the Al-I\* and Zr-I\* samples. The second isotherm curve on each panel is respectively shifted by 0.02 mmol/g in relation to the first isotherm curve.

### Quantitative analysis of CO<sub>2</sub>/N<sub>2</sub> selectivity

CO<sub>2</sub>/N<sub>2</sub> selectivity was estimated by using the Henry's law constants for CO<sub>2</sub> and N<sub>2</sub> adsorption on Al-I\* and Zr-I\* samples. First, the adsorption isotherms measured for the aforementioned systems were fitted by the following form of virial equation.<sup>1,2</sup>

$$\ln \left[ \frac{n}{p} \right] = A_0 + A_1 n + A_2 n^2 + A_3 n^3 \dots$$

where  $n$  is the amount adsorbed (mol g<sup>-1</sup>) at the equilibrium pressure  $p$  (bar). This fitting was performed by using the third-order polynomial (higher terms were neglected). The first virial coefficient  $A_0$  is related to the Henry's constant  $K_H = \exp(A_0)$ . At the surface coverage tending to zero the above virial equation reduces to the Henry's law  $n = K_H p$ .

$A_0$  is related to the adsorbate-adsorbent interaction energy, while  $A_1$  is related to adsorbate-adsorbate interactions. At a given temperature the CO<sub>2</sub>/N<sub>2</sub> selectivity can be defined as the ratio of the corresponding Henry's constants,  $K_H(\text{CO}_2)$  and  $K_H(\text{N}_2)$ :

$$S^T = K_H(CO_2)/K_H(N_2)$$

Adsorption isotherms measured for CO<sub>2</sub> and N<sub>2</sub> on the Al-I\* and Zr-I\* samples at 0 °C and 25 °C were used to evaluate the aforementioned selectivity. Figure S12 shows the experimental adsorption data (points) plotted as  $\ln(n/p)$  versus  $n$  for the aforementioned systems together with the corresponding fitting curves (lines) represented by the third order polynomial as shown above. As can be seen in Figure S12 and Table S1, the fitting curves represent very well adsorption data (correlation coefficient values are in the range of 0.91-0.99).

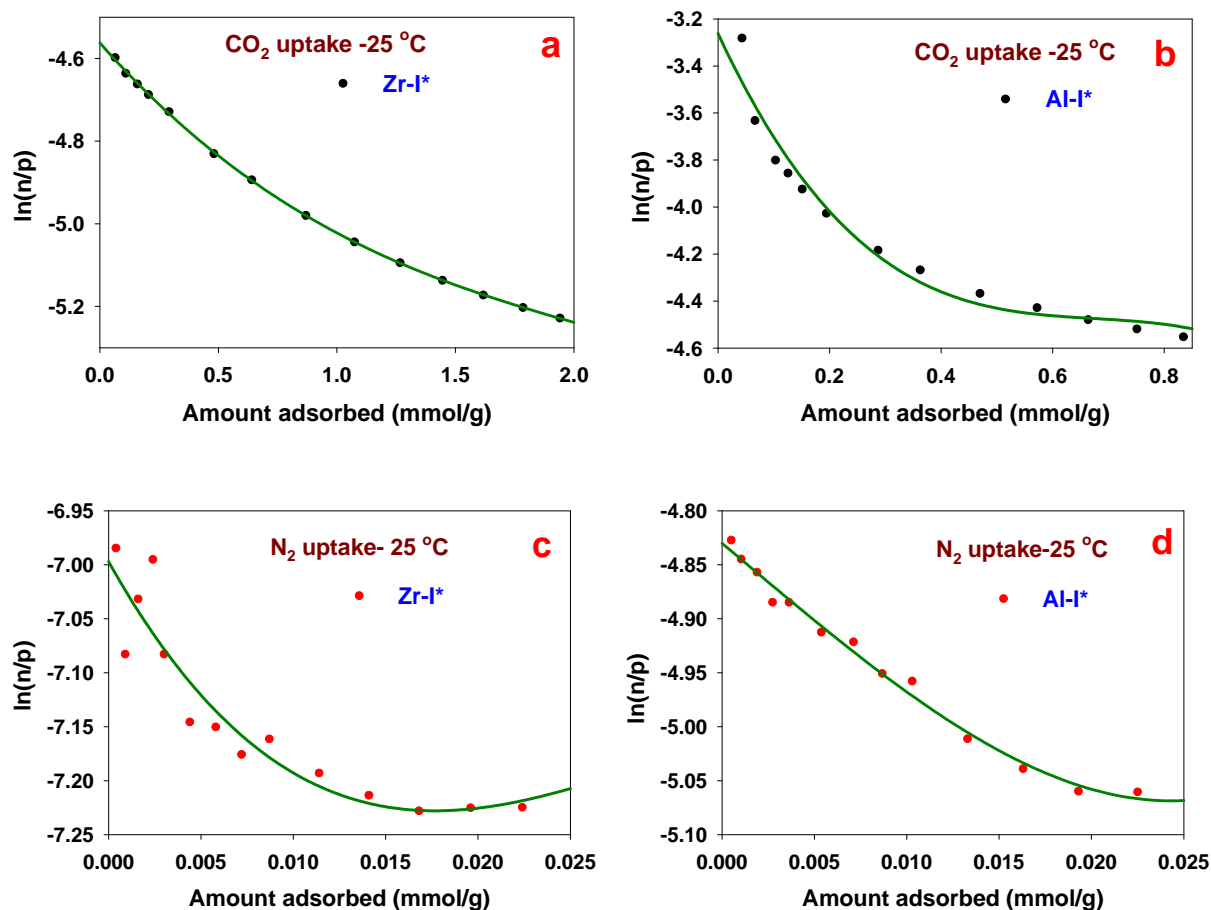

**Figure S12.** Experimental data (points) plotted as  $\ln(n/p)$  versus  $n$  for CO<sub>2</sub> (panels a and b) and N<sub>2</sub> (panels c and d) adsorption on Zr-I\* and Al-I\* at 25 °C together with the corresponding fitting curves (lines) represented by the third order polynomial as shown above; amount adsorbed is expressed in mmol/g and pressure in bar.

**Table S1.** Comparison of the Henry's constants  $K_H = \exp(A_0)$  obtained by using  $A_0$  coefficient of the third-order polynomial (see equation above) for CO<sub>2</sub> and N<sub>2</sub> adsorption on Zr-I\* and Al-I\* at 0 and 25 °C.

|                                 |                                          |                          |                         |
|---------------------------------|------------------------------------------|--------------------------|-------------------------|
| CO <sub>2</sub> uptake at 25 °C | 1 <sup>st</sup> virial coefficient $A_0$ | Henry's constant $K_H$ * | Correlation coefficient |
| Zr-I*                           | $-4.562 \pm 0.003$                       | $10.4 \cdot 10^{-3}$     | 0.99                    |
| Al-I*                           | $-3.261 \pm 0.072$                       | $38.4 \cdot 10^{-3}$     | 0.97                    |
| N <sub>2</sub> uptake at 25 °C  |                                          |                          |                         |
| Zr-I*                           | $-6.997 \pm 0.020$                       | $0.91 \cdot 10^{-3}$     | 0.94                    |
| Al-I*                           | $-4.830 \pm 0.006$                       | $7.98 \cdot 10^{-3}$     | 0.99                    |
| CO <sub>2</sub> uptake at 0 °C  |                                          |                          |                         |
| Zr-I*                           | $-3.056 \pm 0.009$                       | $47.0 \cdot 10^{-3}$     | 0.99                    |
| Al-I*                           | $-2.484 \pm 0.073$                       | $83.4 \cdot 10^{-3}$     | 0.91                    |
| N <sub>2</sub> uptake at 0 °C   |                                          |                          |                         |
| Zr-I*                           | $-5.882 \pm 0.009$                       | $2.78 \cdot 10^{-3}$     | 0.99                    |
| Al-I*                           | $-4.562 \pm 0.031$                       | $10.4 \cdot 10^{-3}$     | 0.99                    |

\*  $K_H$  values were calculated for adsorption expressed in  $\mu\text{mol/g}$  and pressure in bar.

**Table S2.** Selectivity data obtained on the basis of Henry's constants for adsorption of CO<sub>2</sub> and N<sub>2</sub> on Zr-I\* and Al-I\* at 0 and 25 °C .

| Sample | $S^{25}$ | $S^0$ |
|--------|----------|-------|
| Zr-I*  | 11.4     | 16.9  |
| Al-I*  | 4.8      | 8.0   |

## References

1. S. Yang, X. Lin, W. Lewis, M. Suyetin, E. Bichoutskaia, J. E. Parker, C. Tang, D. R. Allan, P. J. Rizkallah, P. Hubberstey, N. R. Champness, K. M. Thomas, A. J. Blake and M. Schröder, *Nature Materials*, 2012, **11**, 710–716.
2. J. G. Bell, X. Zhao, Y. Uygur and K. M. Thomas, *J. Phys. Chem. C*, 2011, **115**, 2776–2789.

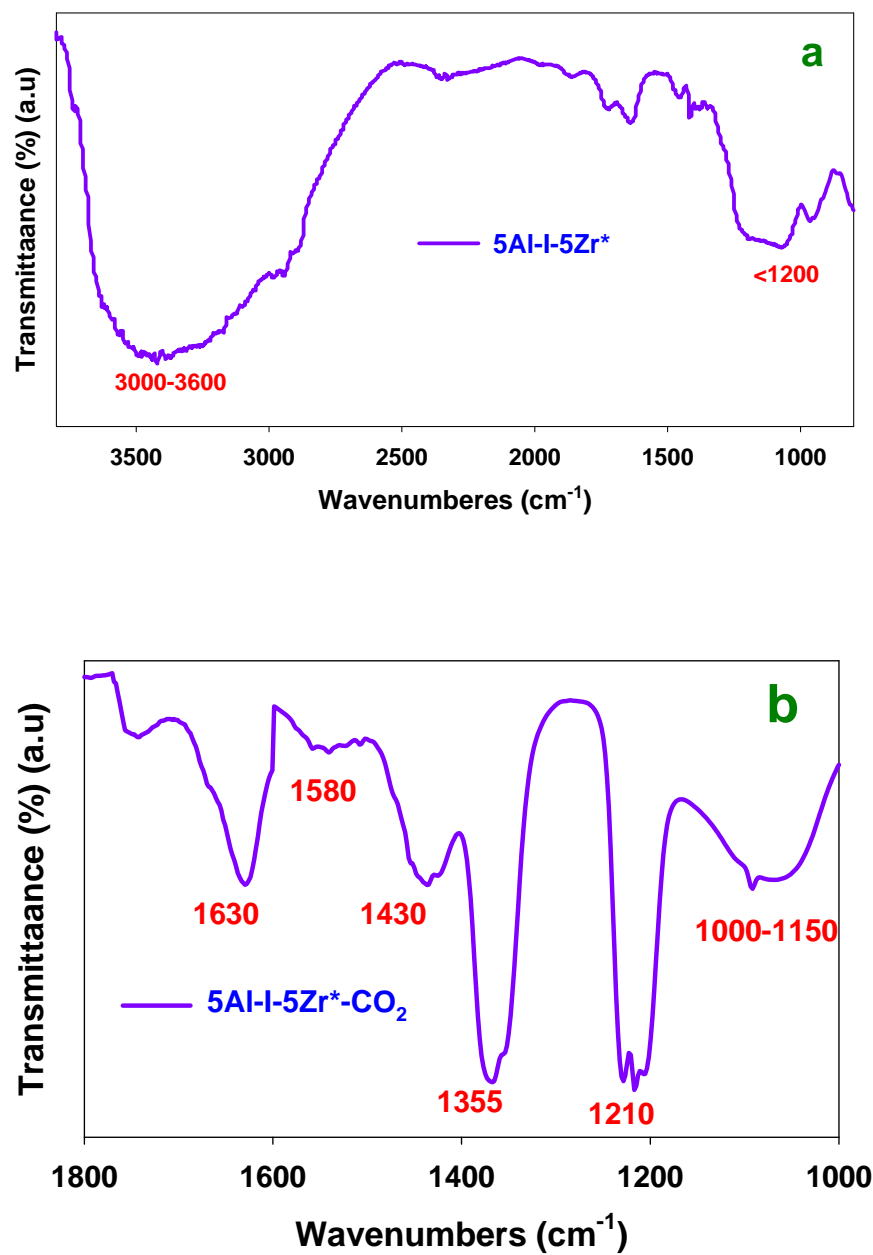

Figure S13. IR spectra of 5Al-I-5Zr\* (a; top panel) and 5Al-I-5Zr\*-CO<sub>2</sub> (b; bottom panel).

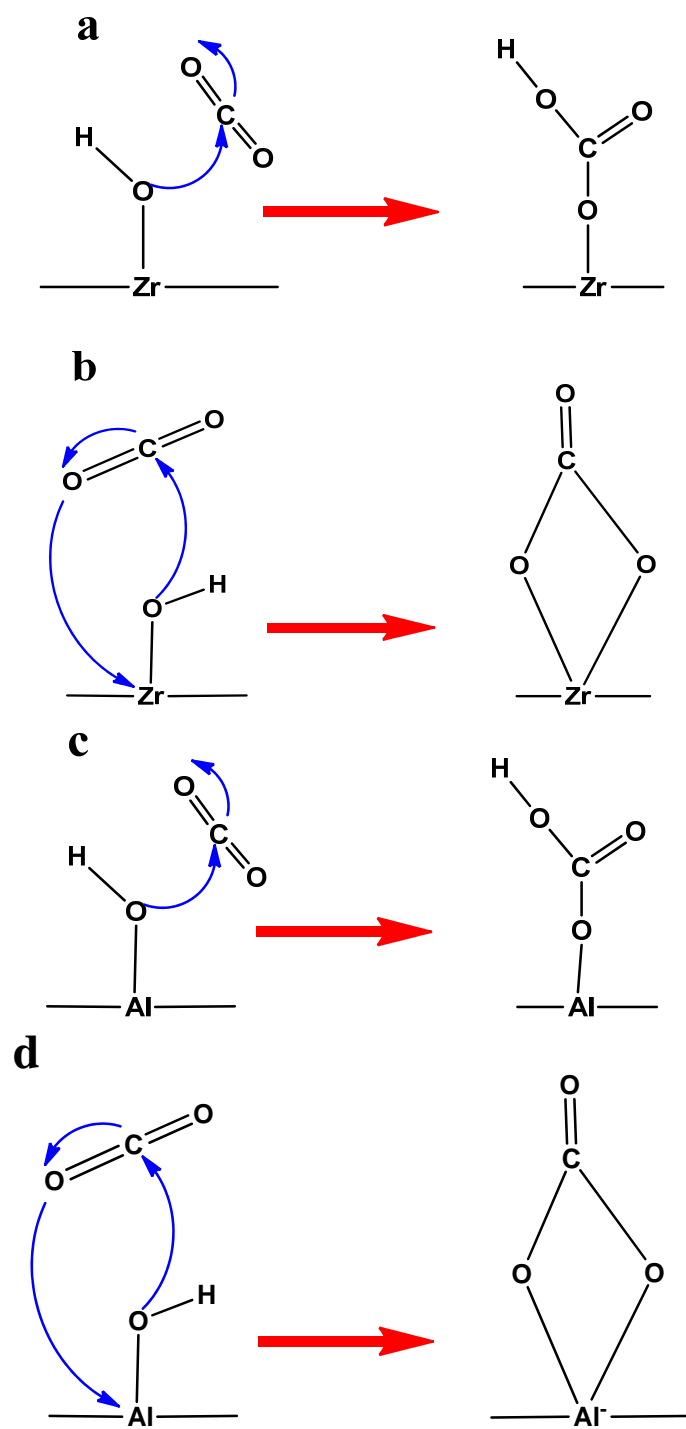

**Figure S14.** Schematic illustration of possible binding models for CO<sub>2</sub> on the surfaces of zirconia and alumina composite samples: **(a and c)** bicarbonate structures; **(b and d)** bi-dentate carbonate structures.
